# Supplementary material for: Circulating microbiome DNA as biomarkers for early diagnosis and recurrence of lung cancer
Source: PubMed Central journal article supplement — Cell Rep Med. 2024 Apr 5;5(4):101499. doi: 10.1016/j.xcrm.2024.101499 (PMC11031421; doi:10.1016/j.xcrm.2024.101499), 2024-04-05
Supplement: mmc1.pdf [file mmc1.pdf]

**Cell Reports Medicine, Volume 5**

**Supplemental information**

**Circulating microbiome DNA as biomarkers  
for early diagnosis and recurrence of lung cancer**

**Haiming Chen, Yi Ma, Juqing Xu, Wenxiang Wang, Hao Lu, Cheng Quan, Fan Yang, Yiming Lu, Hao Wu, and Mantang Qiu**

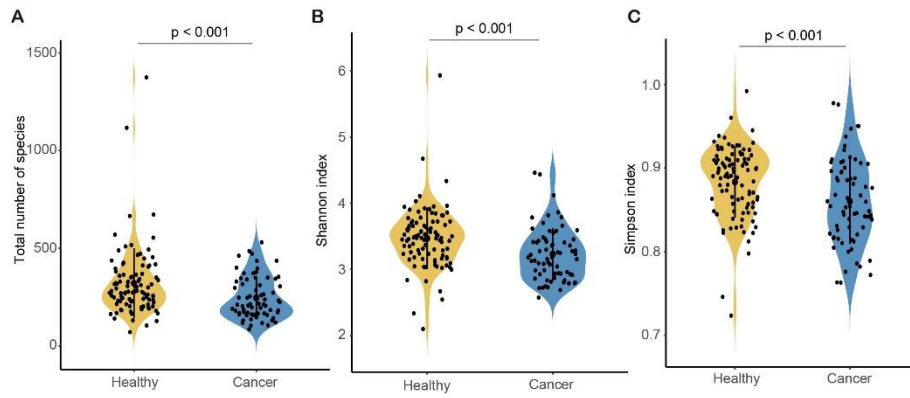

**Figure S1 Alpha diversity between cancer patients and healthy controls in the training cohort. Related to Figures 1.**

(A-C) (A) Total number of detected species, (B) Shannon diversity index and (C) Simpson diversity index was computed from all samples in the healthy and cancer groups.

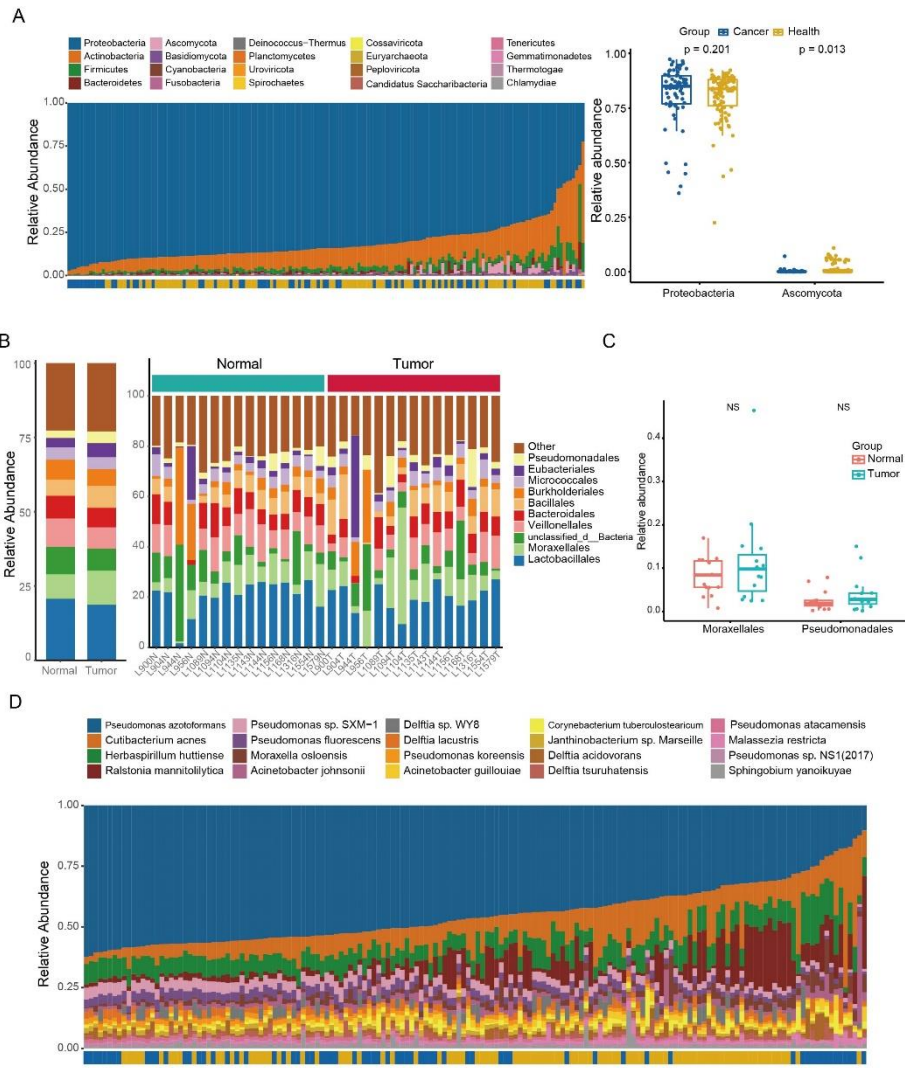

**Figure S2 Tumor microbiome composition in the training dataset from cancer Detection cohort. Related to Figures 2.**

(A) Circulating microbiome composition at the phylum level in the training dataset of Detection model (ordered by the most abundant taxa, *Proteobacteria* phylum). (B) Intratumour microbiome composition at order taxonomic levels in tumor tissue and paired normal tissue. (C) Boxplots showed relative abundance of specific order-level taxa in the intratumour microbiome analysis. (D) circulating microbiome composition at the species level in the training dataset of Detection model (ordered by the most abundant taxa, *Pseudomonas azotoformans* species).

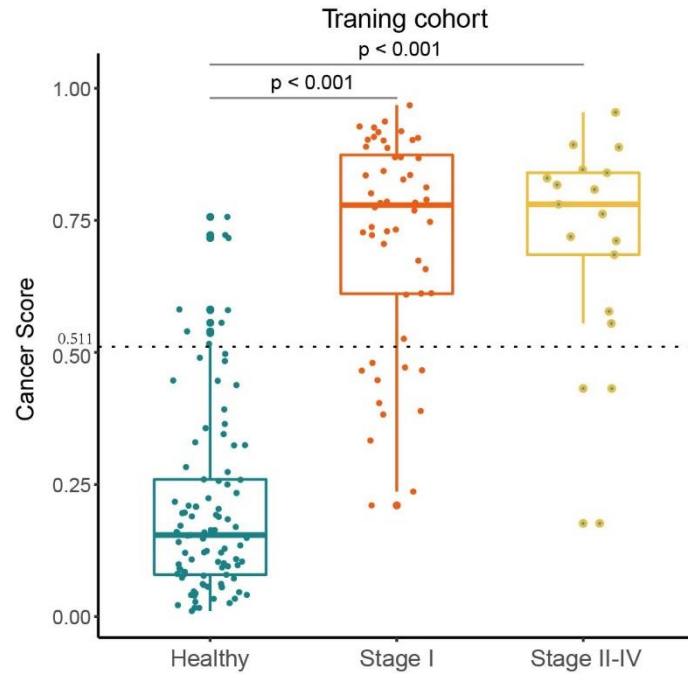

**Figure S3** The boxplots showing the distribution of cancer scores of healthy controls, and cancer patients with different TNM stages in the training cohort. Related to Figures 3.

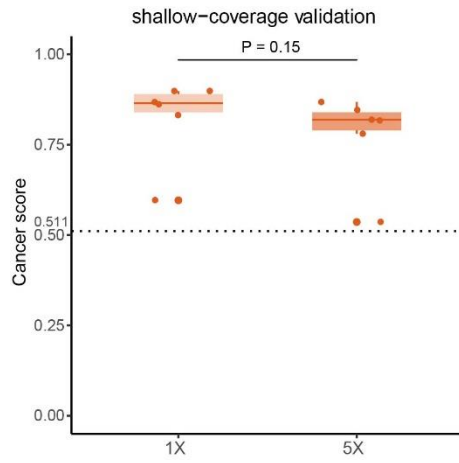

**Figure S4** The boxplots showing the distribution of cancer scores of the additional shallow-coverage dataset in coverage depths of 1X and 5X, and a Wilcoxon test was performed for the comparison between the 1X and the 5X. Related to Figures 4.

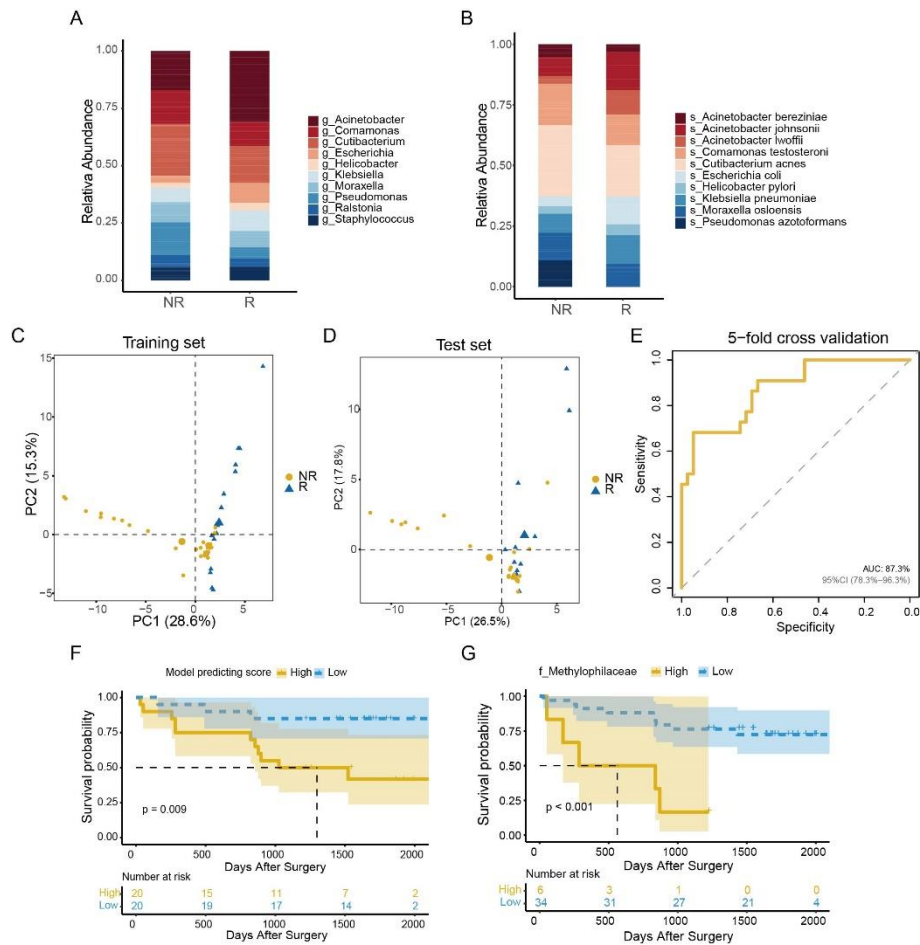

**Figure S5 Differentially enriched circulating microbial taxa are associated with RFS of lung cancer. Related to Figures 5 and 6.**

(A-B) The Bar plots of the genera (A) and species (B) taxonomic levels in recurrence and non-recurrence lung cancer patients in the training set. (C-D) Principle component analysis showed stratification of samples in the training set (C) and the test set by significant taxa relative abundance, respectively. PC1 and PC2 values represented the top two principal coordinates. Different sample types were denoted by color code and shape. (E) Receiver operating characteristic curve of 5-fold cross-validation in the training set. (F) Kaplan-Meier plot of lung cancer patients defined by recurrence model predicting scores in the test set. (G) Kaplan-Meier estimates for RFS probability of patients with different abundance levels of *Methylophilaceae* family.

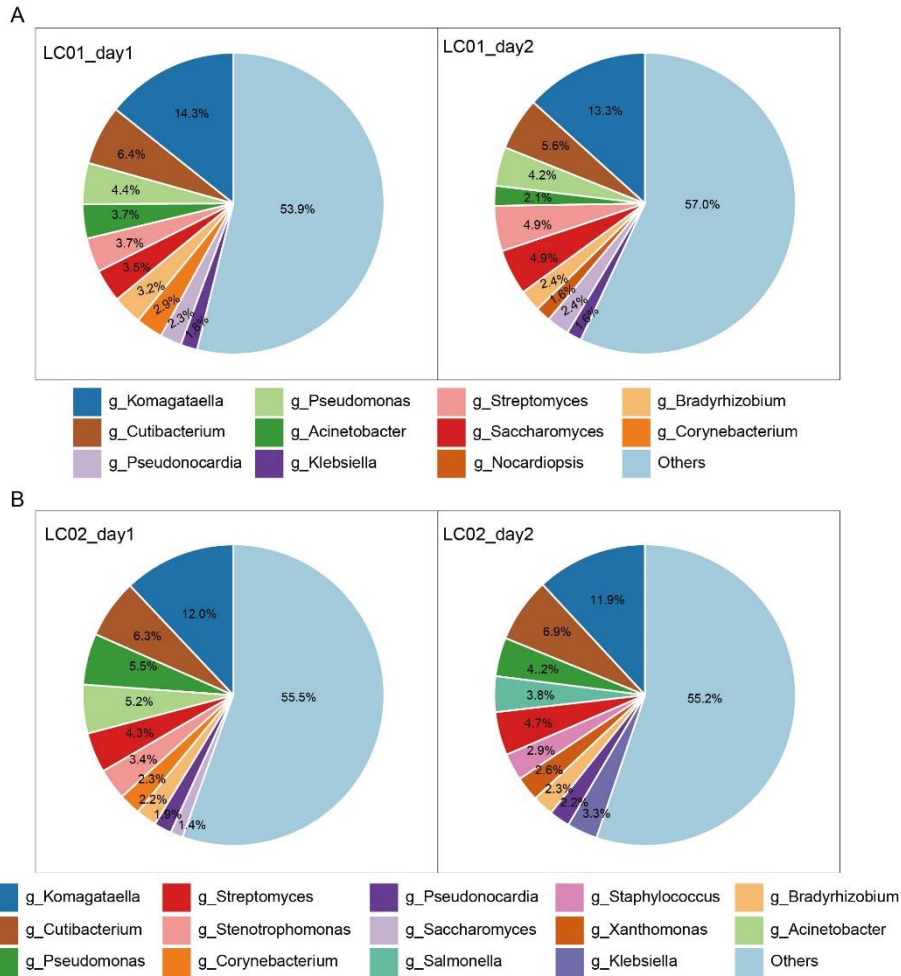

**Figure S6 The circulating microbial DNA profiles both the day before and the day of surgery. Related to the STAR Methods.**

Pie charts showed the most abundance genus in the patient LC01 (A) and the patient LC02 (B) both the day before and the day of surgery.

**Table S3. Clinical characteristics of study participants in the training and validation cohorts and their disposition, related to Figure 1.**

| Cohort                          | Training (N = 166) |                     |       | Validation I (N = 96) |                     |       | Validation II (N = 53) |                     |       |
|---------------------------------|--------------------|---------------------|-------|-----------------------|---------------------|-------|------------------------|---------------------|-------|
|                                 | Cancer<br>(n = 69) | Healthy<br>(n = 97) | P     | Cancer<br>(n = 48)    | Healthy<br>(n = 48) | P     | Cancer<br>(n = 33)     | Healthy<br>(n = 20) | P     |
| <b>Age in years, Mean±SD</b>    | 58.16<br>±9.99     | 59.31<br>±13.23     | 0.526 | 59.79<br>±8.207       | 60.08<br>±10.946    | 0.148 | 69.09<br>±12.428       | 66.15<br>±16.731    | 0.501 |
| <b>Cigarette smoking, n (%)</b> | 25 (36.2%)         | 37 (38.1%)          | 0.802 | 7 (14.6%)             | 8 (16.7%)           | 0.779 | 5 (15.2%)              | 1 (5.0%)            | 0.258 |
| <b>Female, n (%)</b>            | 31 (44.9%)         | 32 (33.0%)          | 0.118 | 27 (56.3%)            | 28(58.3 %)          | 0.837 | 18 (54.5)              | 15 (75.0%)          | 0.136 |
| <b>Histology, n (%)</b>         |                    |                     |       |                       |                     |       |                        |                     |       |
| <b>LUAD</b>                     | 51 (73.9%)         | -                   | -     | 45 (93.7%)            | -                   | -     | 24 (72.7%)             | -                   | -     |
| <b>LUSC</b>                     | 12 (17.4%)         | -                   | -     | 0 (0.0%)              | -                   | -     | 4 (12.1%)              | -                   | -     |
| <b>SCLC</b>                     | 5 (7.2%)           | -                   | -     | 1 (2.1%)              | -                   | -     | 2 (6.1%)               | -                   | -     |
| <b>Others*</b>                  | 1 (1.4%)           | -                   | -     | 2 (4.2%)              | -                   | -     | 3 (9.1%)               | -                   | -     |
| <b>Stage, n (%)</b>             |                    |                     |       |                       |                     |       |                        |                     |       |
| <b>I</b>                        | 52 (75.4%)         | -                   | -     | 41 (85.4%)            | -                   | -     | 0 (0.0%)               | -                   | -     |
| <b>II+III+IV</b>                | 17(24.6%)          | -                   | -     | 7 (14.6%)             | -                   | -     | 33(100.0%)             | -                   | -     |
| <b>Tumor size, n (%)</b>        |                    |                     |       |                       |                     |       |                        |                     |       |
| <b>&lt; 1 cm</b>                | 28 (40.6%)         | -                   | -     | 29 (60.4%)            | -                   | -     | 0 (0.0%)               | -                   | -     |
| <b>≥ 1cm</b>                    | 41 (59.4%)         | -                   | -     | 19 (39.6%)            | -                   | -     | 33 (100.0%)            | -                   | -     |

\*Others: lung adenosquamous carcinoma, large-cell carcinoma of the lung



**Table S5. Lung cancer samples enrolled in intratumor microbiome analysis, related to Figure S2.**

| <b>Sample</b> |
|---------------|
| L900          |
| L904          |
| L944          |
| L956          |
| L1089         |
| L1094         |
| L1104         |
| L1135         |
| L1143         |
| L1144         |
| L1156         |
| L1168         |
| L1316         |
| L1554         |
| L1579         |

**Table S8. The diagnostic performance of the predictive model in the training cohort, related to Figure 3.**

| Training cohort      |         | Actual              |         |
|----------------------|---------|---------------------|---------|
|                      |         | Cancer              | Control |
| Predicted            | Cancer  | 56                  | 9       |
|                      | Control | 13                  | 88      |
| Sensitivity (95% CI) |         | 81.2% (69.6%-89.2%) |         |
| Specificity (95% CI) |         | 90.7% (82.7%-95.4%) |         |
| Accuracy (95% CI)    |         | 86.8% (80.6%-91.5%) |         |

*Definition of abbreviation:* CI= confidence interval.

**Table S10. The diagnostic performance of the predictive model in the validation cohorts, related to Figure 4.**

| <b>Validation cohort I</b>         |                | <b>Actual</b>       |                |
|------------------------------------|----------------|---------------------|----------------|
|                                    |                | <b>Cancer</b>       | <b>Control</b> |
| <b>Predicted</b>                   | <b>Cancer</b>  | 42                  | 12             |
|                                    | <b>Control</b> | 6                   | 36             |
| Sensitivity (95% CI)               |                | 87.5% (74.1%-94.8%) |                |
| Specificity (95% CI)               |                | 75.0% (60.1%-85.9%) |                |
| Accuracy (95% CI)                  |                | 81.3% (72.2%-88.5%) |                |
| <b>Validation cohort II</b>        |                | <b>Actual</b>       |                |
|                                    |                | <b>Cancer</b>       | <b>Control</b> |
| <b>Predicted</b>                   | <b>Cancer</b>  | 29                  | 2              |
|                                    | <b>Control</b> | 4                   | 18             |
| Sensitivity (95% CI)               |                | 87.9% (70.9%-96.0%) |                |
| Specificity (95% CI)               |                | 90.0% (66.9%-98.2%) |                |
| Accuracy (95% CI)                  |                | 88.7% (77.0%-95.7%) |                |
| <b>Combined validation cohorts</b> |                | <b>Actual</b>       |                |
|                                    |                | <b>Cancer</b>       | <b>Control</b> |
| <b>Predicted</b>                   | <b>Cancer</b>  | 71                  | 14             |
|                                    | <b>Control</b> | 10                  | 54             |
| Sensitivity (95% CI)               |                | 87.7% (78.0%-93.6%) |                |
| Specificity (95% CI)               |                | 79.4% (67.5%-87.9%) |                |
| Accuracy (95% CI)                  |                | 83.9% (77.0%-89.4%) |                |

*Definition of abbreviation:* CI= confidence interval.

**Table S12. The cancer scores of additional shallow-coverage dataset, related to Figure 4.**

| Sample   | Low coverages |       |
|----------|---------------|-------|
|          | 5X            | 1X    |
| NJ_C0048 | 0.868         | 0.898 |
| NJ_C0067 | 0.536         | 0.596 |
| NJ_C0070 | 0.846         | 0.868 |
| NJ_C0074 | 0.78          | 0.832 |
| NJ_C0086 | 0.82          | 0.862 |
| NJ_C0092 | 0.818         | 0.898 |

**Table S13.Characteristics of the included participants of the recurrence cohort, related to Figure 5.**

| Characteristics                                    | Train set (N = 61) |             |        | Test set (N = 40) |             |        |
|----------------------------------------------------|--------------------|-------------|--------|-------------------|-------------|--------|
|                                                    | R (n = 22)         | NR (n = 39) | p      | R (n = 14)        | NR (n = 26) | p      |
| <b>Recurrence free survival (years), Mean ± SD</b> | 1.70±0.87          | 4.39±0.86   | <0.001 | 1.65±1.15         | 4.66±0.79   | <0.001 |
| <b>Age (years), Mean±SD</b>                        | 61.36±7.14         | 61.59±8.06  | 0.913  | 58.57±8.36        | 61.81±8.99  | 0.273  |
| <b>Female, n (%)</b>                               | 12 (54.5%)         | 19 (48.7%)  | 0.662  | 8 (57.1%)         | 10 (38.5%)  | 0.257  |
| <b>Cigarette smoking, n (%)</b>                    | 10 (45.5%)         | 11 (28.2%)  | 0.173  | 6 (42.9%)         | 8 (30.8%)   | 0.445  |
| <b>Stage, n (%)</b>                                |                    |             | 0.603  |                   |             | 0.002  |
| <b>I</b>                                           | 13 (59.1%)         | 27 (69.2%)  |        | 5 (35.7%)         | 22 (84.6%)  |        |
| <b>II-III</b>                                      | 9 (40.9%)          | 12 (30.8%)  |        | 9 (64.3%)         | 4 (15.4%)   |        |
| <b>Histology, n (%)</b>                            |                    |             | 0.37   |                   |             | 0.232  |
| <b>LUAD</b>                                        | 20 (90.9%)         | 36 (92.3%)  |        | 12 (85.7%)        | 25 (96.2%)  |        |
| <b>LUSC</b>                                        | 1 (4.5%)           | 3 (7.7%)    |        | 2 (14.3%)         | 1 (3.8%)    |        |
| <b>Others</b>                                      | 1 (4.5%)           | 0 (0.0%)    |        | 0 (0.0%)          | 0 (0.0%)    |        |
| <b>Tumor diameters (cm), Mean ± SD</b>             | 2.29±0.60          | 2.05±0.64   | 0.16   | 1.99±0.72         | 1.90±0.73   | 0.725  |

*R, recurrence group; NR, non-recurrence group; LUAD, lung adenocarcinoma; LUSC, lung squamous cell carcinoma; Others, lung adenosquamous carcinoma*

**Table S14: Significantly differential taxa between R and NR groups, related to Figure 5.**

| feature                                | score    | group | LDA      | p        |
|----------------------------------------|----------|-------|----------|----------|
| s_Limnohabitanssp_103DPR2              | 3.490936 | R     | 3.092666 | 0.001628 |
| s_Phreatobactercathodiphilus           | 1.996731 | NR    | 2.35054  | 0.036657 |
| s_CandidatusMethylopusillusuniversalis | 3.260202 | R     | 2.989751 | 0.000272 |
| s_Paracoccussanguinis                  | 3.049735 | NR    | 2.579703 | 0.047382 |
| s_Pseudomonaskoreensis                 | 2.60036  | NR    | 2.339833 | 0.015943 |
| f_Phreatobacteraceae                   | 1.996731 | NR    | 2.420925 | 0.036657 |
| g_Paracoccus                           | 3.309408 | NR    | 2.696325 | 0.03781  |
| o_Nitrosomonadales                     | 3.292351 | R     | 3.022054 | 8.98E-05 |
| f_Weeksellaceae                        | 3.137434 | NR    | 2.71627  | 0.017542 |
| o_CandidatusNanopelagicales            | 3.783817 | R     | 3.363307 | 0.015678 |
| o_Rhodobacterales                      | 3.312299 | NR    | 2.708654 | 0.03781  |
| s_CandidatusNanopelagicusabundans      | 2.946196 | R     | 2.728211 | 0.009715 |
| g_Malassezia                           | 3.196425 | NR    | 2.869928 | 0.016941 |
| s_Tepidimonastaiwanensis               | 2.670287 | NR    | 2.425536 | 0.024261 |
| g_Tepidimonas                          | 2.670287 | NR    | 2.405391 | 0.024261 |
| s_Acinetobacterpseudolwoffii           | 2.10633  | R     | 2.363092 | 0.019045 |
| g_Psychrobacter                        | 2.443738 | NR    | 2.284315 | 0.015943 |
| f_Malasseziaceae                       | 3.196425 | NR    | 2.810634 | 0.016941 |
| s_Pseudomonassp_B10                    | 2.622441 | NR    | 2.319814 | 0.015943 |
| s_Variovoraxparadoxus                  | 2.368597 | NR    | 2.206128 | 0.015943 |
| p_Firmicutes                           | 4.078506 | NR    | 3.3144   | 0.042595 |
| s_Acinetobactersp_NEB149               | 2.556007 | R     | 2.428587 | 0.019045 |
| s_Flavobacteriumsp_GENT5               | 2.592916 | R     | 2.379265 | 0.019045 |
| g_Sphingomonas                         | 2.565695 | NR    | 2.317423 | 0.015943 |
| g_Staphylococcus                       | 3.847322 | R     | 3.369032 | 0.039949 |
| s_Pseudomonaslactis                    | 2.054425 | NR    | 2.463025 | 0.036657 |
| f_Methylophilaceae                     | 3.292351 | R     | 3.01553  | 8.98E-05 |
| s_Herbaspirillumhuttiense              | 2.862965 | NR    | 2.590948 | 0.015943 |
| s_Sphingomonaspaucimobilis             | 2.48324  | NR    | 2.347997 | 0.015943 |
| s_Pseudomonasmoraviensis               | 2.558204 | NR    | 2.279922 | 0.036657 |
| g_Limnohabitans                        | 3.603065 | R     | 3.23221  | 0.001628 |
| s_Acinetobactercalcoaceticus           | 2.175639 | R     | 2.342373 | 0.019045 |
| s_Corynebacteriumureicelerivorans      | 2.116535 | NR    | 2.180723 | 0.036657 |
| g_Phreatobacter                        | 1.996731 | NR    | 2.285086 | 0.036657 |
| s_CandidatusPlanktophilavernalis       | 3.653169 | R     | 3.171637 | 0.027129 |
| s_Acinetobacteroleivorans              | 2.394791 | R     | 2.273913 | 0.006332 |
| s_Psychrobactersanguinis               | 2.419681 | NR    | 2.250923 | 0.015943 |
| s_Acinetobacterradioresistens          | 2.523844 | R     | 2.238038 | 0.037195 |
| g_CandidatusNanopelagicus              | 3.105997 | R     | 2.845843 | 0.003096 |
| o_Propionibacterales                   | 4.485492 | NR    | 3.775424 | 0.041089 |
| s_Brevundimonasmediterranea            | 2.631862 | R     | 2.330522 | 0.037195 |

|                                 |          |    |          |          |
|---------------------------------|----------|----|----------|----------|
| g_CandidatusMethylopumilus      | 3.274036 | R  | 3.013744 | 0.000272 |
| s_Pseudomonasazotoformans       | 4.001611 | NR | 3.686345 | 0.006707 |
| s_Pseudomonassp_SXM_1           | 2.81565  | NR | 2.53472  | 0.015943 |
| s_Limnohabitanssp_63ED37_2      | 2.935637 | R  | 2.725227 | 0.003097 |
| o_Malasseziales                 | 3.196425 | NR | 2.848594 | 0.016941 |
| f_CandidatusNanopelagicaceae    | 3.783817 | R  | 3.376195 | 0.015678 |
| s_CandidatusNanopelagicuslimnes | 2.572038 | R  | 2.549058 | 0.002083 |
| g_Variovorax                    | 2.616205 | NR | 2.360406 | 0.015943 |
| s_Pseudomonaspoae               | 2.123864 | NR | 2.262788 | 0.036657 |
| s_Paracoccusmarcusii            | 2.215384 | NR | 2.076205 | 0.036657 |
| s_Malasseziarestricta           | 3.196425 | NR | 2.799819 | 0.016941 |
| s_Ralstoniapickettii            | 2.312351 | NR | 2.303224 | 0.036657 |
| s_Pseudomonassp_NS1_2017_       | 2.2469   | NR | 2.244133 | 0.024261 |
| s_Chryseobacteriumsp_ZHDP1      | 2.868544 | NR | 2.590359 | 0.015943 |
| f_Rhodobacteraceae              | 3.312299 | NR | 2.69072  | 0.03781  |
| s_Ralstoniamannitolilytica      | 3.634975 | NR | 3.336194 | 0.015943 |
| s_Acinetobacterpittii           | 2.395057 | R  | 2.322208 | 0.019045 |
| g_CandidatusPlanktophila        | 3.677635 | R  | 3.216565 | 0.024997 |
| p_Basidiomycota                 | 3.196425 | NR | 2.845506 | 0.016941 |
| c_Malasseziomycetes             | 3.196425 | NR | 2.854624 | 0.016941 |
| g_Herbaspirillum                | 2.862965 | NR | 2.582135 | 0.015943 |

---

**Table S15. Model predicting score adjusted by TNM stage, related to Figure S5.**

|                          | Univariable           |       | Multivariable          |         |
|--------------------------|-----------------------|-------|------------------------|---------|
|                          | HR (95%CI)            | p     | HR (95%CI)             | p       |
| Predicting score         | 13.091 (2.236-76.652) | 0.004 | 27.848 (3.581-216.534) | 0.001   |
| TNM Stage (II-III vs. I) | 5.751 (1.910-17.314)  | 0.002 | 7.619 (2.358-24.620)   | < 0.001 |



**Table S16. The top 20 of genus-level taxa of circulating microbial DNA profiles both the day before and the day of surgery, related to the STAR Methods.**

| LC01_day1                 | LC01_day2                 | LC02_day1                 | LC02_day2                |
|---------------------------|---------------------------|---------------------------|--------------------------|
| <i>g_Komagataella</i>     | <i>g_Komagataella</i>     | <i>g_Komagataella</i>     | <i>g_Komagataella</i>    |
| <i>g_Cutibacterium</i>    | <i>g_Cutibacterium</i>    | <i>g_Cutibacterium</i>    | <i>g_Cutibacterium</i>   |
| <i>g_Pseudomonas</i>      | <i>g_Saccharomyces</i>    | <i>g_Pseudomonas</i>      | <i>g_Streptomyces</i>    |
| <i>g_Acinetobacter</i>    | <i>g_Streptomyces</i>     | <i>g_Acinetobacter</i>    | <i>g_Pseudomonas</i>     |
| <i>g_Streptomyces</i>     | <i>g_Pseudomonas</i>      | <i>g_Streptomyces</i>     | <i>g_Salmonella</i>      |
| <i>g_Saccharomyces</i>    | <i>g_Pseudonocardia</i>   | <i>g_Stenotrophomonas</i> | <i>g_Klebsiella</i>      |
| <i>g_Bradyrhizobium</i>   | <i>g_Bradyrhizobium</i>   | <i>g_Corynebacterium</i>  | <i>g_Staphylococcus</i>  |
| <i>g_Corynebacterium</i>  | <i>g_Acinetobacter</i>    | <i>g_Bradyrhizobium</i>   | <i>g_Xanthomonas</i>     |
| <i>g_Pseudonocardia</i>   | <i>g_Nocardiosis</i>      | <i>g_Pseudonocardia</i>   | <i>g_Bradyrhizobium</i>  |
| <i>g_Klebsiella</i>       | <i>g_Klebsiella</i>       | <i>g_Saccharomyces</i>    | <i>g_Pseudonocardia</i>  |
| <i>g_Nocardiosis</i>      | <i>g_Mesorhizobium</i>    | <i>g_Mesorhizobium</i>    | <i>g_Acinetobacter</i>   |
| <i>g_Malassezia</i>       | <i>g_Corynebacterium</i>  | <i>g_Nocardiosis</i>      | <i>g_Corynebacterium</i> |
| <i>g_Staphylococcus</i>   | <i>g_Nocardioidea</i>     | <i>g_Sphingomonas</i>     | <i>g_Nocardiosis</i>     |
| <i>g_Paracoccus</i>       | <i>g_Halomonas</i>        | <i>g_Brevundimonas</i>    | <i>g_Micrococcus</i>     |
| <i>g_Escherichia</i>      | <i>g_Paracoccus</i>       | <i>g_Nocardioidea</i>     | <i>g_Burkholderia</i>    |
| <i>g_Actinomyces</i>      | <i>g_Microbacterium</i>   | <i>g_Microbacterium</i>   | <i>g_Nocardioidea</i>    |
| <i>g_Brevundimonas</i>    | <i>g_Sphingomonas</i>     | <i>g_Paracoccus</i>       | <i>g_Mesorhizobium</i>   |
| <i>g_Methylobacterium</i> | <i>g_Malassezia</i>       | <i>g_Methylobacterium</i> | <i>g_Malassezia</i>      |
| <i>g_Nocardioidea</i>     | <i>g_Methylobacterium</i> | <i>g_Xanthomonas</i>      | <i>g_Sphingomonas</i>    |
| <i>g_Stenotrophomonas</i> | <i>g_Roseomonas</i>       | <i>g_Staphylococcus</i>   | <i>g_Roseomonas</i>      |
